# Supplementary material
Source: HighWire-hosted journal article supplement (https://www.ajnr.org/highwire/filestream/52311/field_highwire_adjunct_files/0/2868_tables.pdf)
Supplement: 2868_tables.pdf [file 2868_tables.pdf]

**On-line Table 1: MTR values for all brain regions**

|                      | Control<br>Mean (SD) | PMGC<br>Mean (SD) | MHD<br>Mean (SD) | <i>P</i>           |                   |                |
|----------------------|----------------------|-------------------|------------------|--------------------|-------------------|----------------|
|                      |                      |                   |                  | Control vs<br>PMGC | Control vs<br>MHD | PMGC vs<br>MHD |
| White matter         |                      |                   |                  |                    |                   |                |
| Peak height          | 1.080 (0.271)        | 1.118 (0.212)     | 0.860 (0.234)    | 0.859              | 0.006*            | 0.001*         |
| Mean MTR             | 0.389 (0.017)        | 0.389 (0.015)     | 0.378 (0.017)    | 0.986              | 0.052             | 0.086          |
| Cortical gray matter |                      |                   |                  |                    |                   |                |
| Peak height          | 0.769 (0.121)        | 0.723 (0.118)     | 0.610 (0.145)    | 0.435              | 0.000*            | 0.010*         |
| Mean MTR             | 0.330 (0.131)        | 0.326 (0.125)     | 0.314 (0.174)    | 0.687              | 0.001*            | 0.010*         |
| Right caudate        |                      |                   |                  |                    |                   |                |
| Peak height          | 0.804 (0.209)        | 0.871 (0.198)     | 0.757 (0.198)    | 0.486              | 0.701             | 0.144          |
| Mean MTR             | 0.349 (0.029)        | 0.341 (0.027)     | 0.325 (0.035)    | 0.603              | 0.020*            | 0.199          |
| Left caudate         |                      |                   |                  |                    |                   |                |
| Peak height          | 0.884 (0.203)        | 0.949 (0.207)     | 0.812 (0.231)    | 0.550              | 0.474             | 0.084          |
| Mean MTR             | 0.367 (0.029)        | 0.359 (0.021)     | 0.346 (0.036)    | 0.586              | 0.041*            | 0.330          |
| Right putamen        |                      |                   |                  |                    |                   |                |
| Peak height          | 1.223 (0.388)        | 1.238 (0.292)     | 0.976 (0.288)    | 0.985              | 0.029*            | 0.023*         |
| Mean MTR             | 0.341 (0.019)        | 0.333 (0.024)     | 0.325 (0.023)    | 0.448              | 0.034*            | 0.410          |
| Left putamen         |                      |                   |                  |                    |                   |                |
| Peak height          | 1.316 (0.329)        | 1.299 (0.241)     | 1.050 (0.290)    | 0.977              | 0.006*            | 0.014*         |
| Mean MTR             | 0.358 (0.018)        | 0.351 (0.022)     | 0.356 (0.017)    | 0.475              | 0.932             | 0.711          |
| Right pallidum       |                      |                   |                  |                    |                   |                |
| Peak height          | 1.449 (0.400)        | 1.587 (0.296)     | 1.324 (0.400)    | 0.404              | 0.480             | 0.049*         |
| Mean MTR             | 0.385 (0.022)        | 0.382 (0.014)     | 0.385 (0.022)    | 0.850              | 0.996             | 0.816          |
| Left pallidum        |                      |                   |                  |                    |                   |                |
| Peak height          | 1.563 (0.369)        | 1.514 (0.285)     | 1.268 (0.332)    | 0.868              | 0.008*            | 0.038*         |
| Mean MTR             | 0.382 (0.027)        | 0.384 (0.015)     | 0.394 (0.018)    | 0.951              | 0.098             | 0.197          |
| Right thalamus       |                      |                   |                  |                    |                   |                |
| Peak height          | 0.995 (0.297)        | 1.027 (0.215)     | 0.864 (0.227)    | 0.896              | 0.173             | 0.078          |
| Mean MTR             | 0.369 (0.028)        | 0.360 (0.025)     | 0.340 (0.038)    | 0.536              | 0.005*            | 0.093          |
| Left thalamus        |                      |                   |                  |                    |                   |                |
| Peak height          | 1.055 (0.253)        | 1.114 (0.241)     | 0.906 (0.278)    | 0.711              | 0.115             | 0.021*         |
| Mean MTR             | 0.380 (0.035)        | 0.372 (0.018)     | 0.355 (0.040)    | 0.709              | 0.024*            | 0.168          |
| Right amygdala       |                      |                   |                  |                    |                   |                |
| Peak height          | 1.299 (0.318)        | 1.294 (0.228)     | 1.127 (0.263)    | 0.998              | 0.080             | 0.105          |
| Mean MTR             | 0.362 (0.020)        | 0.361 (0.020)     | 0.355 (0.020)    | 0.977              | 0.463             | 0.607          |
| Left amygdala        |                      |                   |                  |                    |                   |                |
| Peak height          | 1.462 (0.343)        | 1.399 (0.231)     | 1.178 (0.280)    | 0.733              | 0.003*            | 0.032*         |
| Mean MTR             | 0.373 (0.028)        | 0.374 (0.021)     | 0.368 (0.021)    | 0.997              | 0.679             | 0.648          |
| Right hippocampus    |                      |                   |                  |                    |                   |                |
| Peak height          | 1.220 (0.334)        | 1.266 (0.239)     | 1.081 (0.195)    | 0.821              | 0.170             | 0.054          |
| Mean MTR             | 0.369 (0.025)        | 0.363 (0.016)     | 0.357 (0.021)    | 0.592              | 0.122             | 0.593          |
| Left hippocampus     |                      |                   |                  |                    |                   |                |
| Peak height          | 0.954 (0.273)        | 0.965 (0.207)     | 0.882 (0.230)    | 0.985              | 0.555             | 0.473          |
| Mean MTR             | 0.390 (0.027)        | 0.382 (0.018)     | 0.383 (0.017)    | 0.400              | 0.540             | 0.972          |

**Note:**—MTR values for white matter, gray matter, subcortical gray matter structures. Peak height represents a normalized for volume peak height.

\* indicates a significant finding ( $P < 0.05$ ).

| <b>On-line Table 2: Regression analysis per region of interest</b> |        |        |       |        |        |        |        |        |       |        |
|--------------------------------------------------------------------|--------|--------|-------|--------|--------|--------|--------|--------|-------|--------|
|                                                                    | Burden | TMS    | TFC   | Tap    | Tongue | SDMT   | Stroop | TMT    | VF    | UPSIT  |
| WM                                                                 |        |        |       |        |        |        |        |        |       |        |
| Peak height                                                        | .204** | .257** | .074* | .168** | .110*  | .097*  | .060   | .089*  | .000  | .151** |
| Mean MTR                                                           | .114*  | .163** | .025  | .080   | .034   | .057   | .036   | .037   | .004  | .160** |
| CGM                                                                |        |        |       |        |        |        |        |        |       |        |
| Peak height                                                        | .193** | .189** | .061  | .111*  | .049   | .062   | .063   | .092*  | .003  | .058*  |
| Mean MTR                                                           | .083*  | .152** | .110* | .098*  | .062   | .114*  | .125*  | .136** | .034  | .122*  |
| Right CN                                                           |        |        |       |        |        |        |        |        |       |        |
| Peak height                                                        | .059   | .054   | .019  | .040   | .001   | .021   | .061   | .009   | .000  | .014   |
| Mean MTR                                                           | .076*  | .153** | .036  | .105*  | .008   | .050   | .052   | .034   | .003  | .101*  |
| Left CN                                                            |        |        |       |        |        |        |        |        |       |        |
| Peak height                                                        | .083*  | .160** | .034  | .116*  | .104*  | .038   | .070   | .010   | .022  | .104*  |
| Mean MTR                                                           | .047   | .111*  | .017  | .094*  | .037   | .012   | .026   | .025   | .000  | .141*  |
| Right putamen                                                      |        |        |       |        |        |        |        |        |       |        |
| Peak height                                                        | .055   | .181** | .053  | .112*  | .044   | .067   | .067   | .038   | .001  | .061   |
| Mean MTR                                                           | .000   | .077   | .038  | .013   | .001   | .021   | .037   | .005   | .001  | .002   |
| Left putamen                                                       |        |        |       |        |        |        |        |        |       |        |
| Peak height                                                        | .076*  | .209** | .090* | .117*  | .060   | .054   | .077*  | .035   | .000  | .070   |
| Mean MTR                                                           | .025   | .000   | .007  | .010   | .002   | .041   | .035   | .006   | .078* | .008   |
| Right pallidum                                                     |        |        |       |        |        |        |        |        |       |        |
| Peak height                                                        | .110*  | .175** | .035  | .174** | .051   | .071   | .048   | .041   | .004  | .075   |
| Mean MTR                                                           | .001   | .017   | .046  | .003   | .001   | .001   | .006   | .019   | .033  | .010   |
| Left pallidum                                                      |        |        |       |        |        |        |        |        |       |        |
| Peak height                                                        | .104*  | .164** | .043  | .131*  | .051   | .060   | .070   | .080*  | .000  | .045   |
| Mean MTR                                                           | .001   | .001   | .026  | .000   | .012   | .036   | .053   | .011   | .034  | .004   |
| Right amygdala                                                     |        |        |       |        |        |        |        |        |       |        |
| Peak height                                                        | .145** | .128*  | .023  | .098*  | .016   | .037   | .034   | .020   | .002  | .116*  |
| Mean MTR                                                           | .026   | .033   | .034  | .058   | .009   | .025   | .043   | .044   | .036  | .041   |
| Left amygdala                                                      |        |        |       |        |        |        |        |        |       |        |
| Peak height                                                        | .252** | .184** | .060  | .216** | .134*  | .170** | .116*  | .086*  | .071  | .172** |
| Mean MTR                                                           | .000   | .000   | .007  | .003   | .005   | .038   | .047   | .068   | .109* | .003   |
| Right HC                                                           |        |        |       |        |        |        |        |        |       |        |
| Peak height                                                        | .190** | .091*  | .002  | .075   | .002   | .073   | .026   | .010   | .001  | .061   |
| Mean MTR                                                           | .015   | .041   | .075  | .037   | .012   | .043   | .073   | .070   | .025  | .034   |
| Left HC                                                            |        |        |       |        |        |        |        |        |       |        |
| Peak height                                                        | .095*  | .062   | .000  | .020   | .015   | .022   | .085*  | .026   | .039  | .011   |
| Mean MTR                                                           | .003   | .006   | .002  | .013   | .001   | .015   | .027   | .006   | .010  | .008   |
| Right thalamus                                                     |        |        |       |        |        |        |        |        |       |        |
| Peak height                                                        | .124*  | .099*  | .025  | .100*  | .007   | .043   | .055   | .015   | .002  | .045   |
| Mean MTR                                                           | .162** | .215** | .057  | .172** | .033   | .072*  | .066   | .061   | .009  | .156** |
| Left thalamus                                                      |        |        |       |        |        |        |        |        |       |        |
| Peak height                                                        | .154** | .223** | .065  | .167** | .122*  | .075   | .110*  | .030   | .032  | .122*  |
| Mean MTR                                                           | .117*  | .156** | .027  | .134*  | .046   | .035   | .044   | .042   | .004  | .158** |

**Note:**—Regression analysis between 14 clinical and 2 MTI measures in regions of interest. Values stated are *R* square changes. WM indicates white matter; CGM, cortical gray matter; CN, caudate nucleus; HC, hippocampus; TMS, total motor score; TFC, total functional capacity; SDMT, Symbol Digit Modality Test; TMT, Trail-Making Test; VF, verbal fluency; UPSIT, University of Pennsylvania Smell Identification Test. *Bold* indicates significant finding ( $P < 0.05$ ).  
\*  $P < 0.05$ . \*\*  $P < 0.005$ .
